# Supplementary material
Source: publisher figshare collection journal article supplement (https://acs.figshare.com/ndownloader/files/10648558)
Supplement: Supplementary file 1 [file 10648558]

## Supporting Information

### Direct Selection of Fluorescence-Enhancing RNA Aptamers

Michael Gotrik, Gurpreet Sekhon, Saumya Saurabh, Margaret Nakamoto, Michael Eisenstein, H. Tom Soh

#### Supplementary Figures

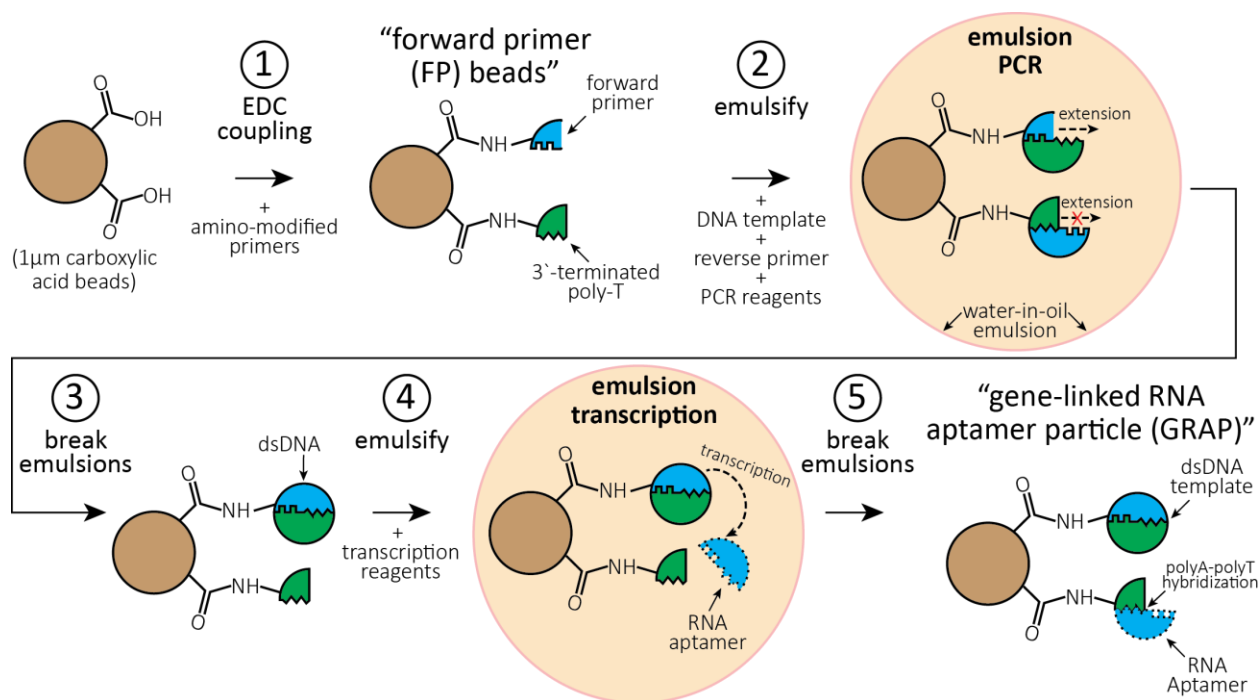

**Figure S1: Assembly of Gene-linked RNA Aptamer Particles (GRAPs).** 1  $\mu$ m paramagnetic, polystyrene carboxylic acid beads undergo EDC conjugation chemistry (**Step 1**) in the presence of a 1:9 ratio of 5'-amino modified forward primer (FP) and 5'-amino modified, 3'-terminated poly-T primer. The resulting FP beads are then emulsified in the presence of reverse primer and PCR reagents (**Step 2**) such that each water-in-oil emulsion contains, on average, zero or one DNA template. Emulsion PCR is performed, the emulsions are broken (**Step 3**), and excess reagents are washed away to yield particles that each express multiple identical copies of the starting DNA template. Because the poly-T is terminated with a 3'-inverted deoxythymidine, it is not extended during PCR. These beads then undergo a second emulsion reaction (**Step 4**) in the presence of T7 transcription mix. The DNA template, which contains a 5' T7 promoter and a 3' poly-A tail, is transcribed to yield a single-stranded RNA sequence that pairs with the expressed poly-T primer through complementary base hybridization. The emulsions are broken (**Step 5**) and excess reagents are washed away to yield gene-linked RNA aptamer particles (GRAPs).



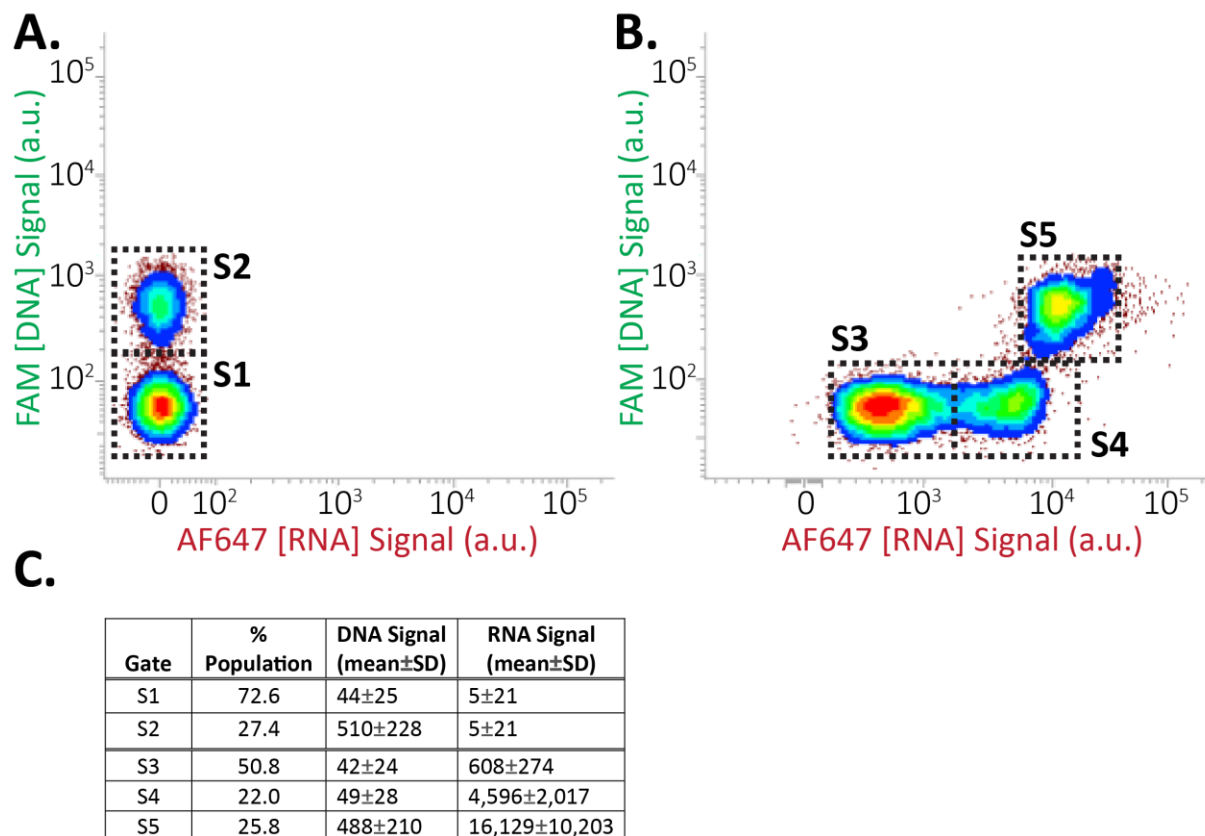

**Figure S3: Characterization of GRAPs.** After emulsion PCR (ePCR) in the presence of FAM-labeled reverse primer (FAM-RP-poly-T, Table S1), beads were subjected to emulsion transcription to yield a GRAP library under conditions where only 15-30% of beads contain both DNA and RNA to ensure the beads are monoclonal. **A)** FAM vs. Alexa Fluor 647 signals of beads immediately following emulsion transcription. Gate S1 contains forward primer beads that remain free of covalently-linked DNA after emulsion PCR. Gate S2 contains beads coated with multiple identical copies of FAM-labeled double-stranded DNA. **B)** FAM vs. Alexa Fluor 647 signals of beads following emulsion transcription and incubation with an Alexa Fluor 647-labeled FP-complementary oligo (647-FP-complement, Table S1). Because FP beads are coated with  $\sim 10$ -fold more poly-T than FP, all beads should fluoresce with the addition of 647-FP-complement. However, RNA-coated beads will capture greater amounts of 647-FP-complement due to the transcribed region of the FP, which remains single-stranded upon RNA capture. Gate S3 contains beads that display no DNA nor RNA. Gate S4 contains beads that display no DNA but have an RNA signal, possibly due to non-specifically-bound, carryover DNA becoming transcribed. Gate S5 contains beads displaying both RNA and parent DNA. During FACS sorting, only beads displaying a high DNA signal are considered to ensure that DNA-free, RNA-coated beads (*e.g.*, Gate S4) are not collected. **C)** Mean fluorescent signals (arbitrary units) of beads in each gate. DNA and RNA signals are not comparable to one another due to the different fluorophores, emission channels, and laser settings being used.

## Supplementary Tables

**Table S1: Oligos used during GRAP display.** The following sequences were ordered from IDT with the modifications listed (using standard IDT abbreviations). Standard desalting was used except for oligos with modifications, for which HPLC purification was performed. All sequences were ordered as single-stranded DNA except for MGA, which was ordered as double-stranded DNA for use in transcription. /56-FAM/ represents 5' 6-FAM, /5AmMC6/ represents a 5' amino modification with a six-carbon linker, /iSp18/ represents an 18-atom hexa-ethyleneglycol spacer, /3InvdT/ represents a 3' inverted deoxythymidine, and /5Alex647N/ represents 5' Alexa Fluor 647.

| Oligo Name         | DNA Sequence (5' → 3')                                                                                                                              |
|--------------------|-----------------------------------------------------------------------------------------------------------------------------------------------------|
| Structured Library | TAATACGACT CACTATAGGG ACACAATGGA CGNNNNNNNN NNNNNNNCCG<br>ACTGGCGAGA GCCAGGTAAC GAATGNNNNN NNNNNNNNNN TAACGGCCGA CATGAGAG                           |
| Naïve Library      | TAATACGACT CACTATAGGG ACACAATGGA CGNNNNNNNN NNNNNNNNNN<br>NNNNNNNNNN NNNNNNNNNN NNTAACGGCC GACATGAGAG                                               |
| FP                 | TAATACGACT CACTATAGGG ACACAATGGA CG                                                                                                                 |
| RP                 | CTCTCATGTC GGCCGTTA                                                                                                                                 |
| RP-poly-T          | TTTTTTTTTT TTTTTTTTTT TTTTCTCTC ATGTCGGCCG TTA                                                                                                      |
| FAM-RP-poly-T      | /56-FAM/- TTTTTTTTTT TTTTTTTTTT TTTTCTCTC ATGTCGGCCG TTA                                                                                            |
| AmM-FP             | /5AmMC6//iSp18//iSp18//iSp18//iSp18/- TAATACGACT CACTATAGGG<br>ACACAATGGA CG                                                                        |
| AmM-pT             | /5AmMC6//iSp18//iSp18//iSp18//iSp18/- TTTTTTTTTT TTTTTTTTTT<br>TTTT/3InvdT/                                                                         |
| 647-FP-complement  | /5Alex647N/- CGTCCATTGT GTCCCTATAG TGAGTCGTAT TA                                                                                                    |
| FAM-FP-complement  | /56-FAM/- CGTCCATTGT GTCCCTATAG TGAGTCGTAT TA                                                                                                       |
| FAM-poly-A         | /56-FAM/- AAAAAAAAAA AAAAAAAAAA AAAAA                                                                                                               |
| MGA                | TAATACGACT CACTATAGGG AACACTATCC GACTGGCACC CCCCTGCCAG<br>GTAACGAATG AAGTGCTTTT CTCGATCTCG TGACCCGCGC ACTAGTCGCG<br>AAGGTGTATG TCCTTGGTCA TTAGGATCC |
| minimized MGA      | TAATACGACT CACTATAGGG ATCCGACTGG CGAGAGCCAG GTAACGAATG GATCC                                                                                        |

**Table S2: Sequences of aptamers selected from the structured library.** Sequences **MG-D1** and **MG-D2** are identical except for the underlined base. Sequences **MG-D7**, **MG-D8**, and **MG-D9** are identical except for the underlined base. **MG-D6** has two deletions from the starting library, which are represented by blanks to maintain alignment. The conserved, destabilized minimal **MGA** region is bolded, and random regions are separated from conserved regions by hyphens.

| Name (MG-) | DNA Sequence (5' → 3')                                                                                           |
|------------|------------------------------------------------------------------------------------------------------------------|
| D1         | GGGACACAATGGACG-ACACGCCATTGTCCT- <b>CCGACTGGCGAGAGCCAGGTAACGAATG</b> -AGGTTTCTAAGTGTA-TAACGGCCGACATGAGAG         |
| D2         | GGGACACAATGGACG-ACACGCCATTGTCCT- <b>CCGACTGGT</b> <u>GAGAGCCAGGTAACGAATG</u> -AGGTTTCTAAGTGTA-TAACGGCCGACATGAGAG |
| D3         | GGGACACAATGGACG-CAGATAATCGGATTC- <b>CCGACTGGCGAGAGCCAGGTAACGAATG</b> -GGCCGGTTTCTGTGT-TAACGGCCGACATGAGAG         |
| D4         | GGGACACAATGGACG-CCTTTAAGGGGCTCG- <b>CCGACTGGCGAGAGCCAGGTAACGAATG</b> -CGAGGCTCGGAAAAG-TAACGGCCGACATGAGAG         |
| D5         | GGGACACAATGGACG-CGCCCAGGATCTCTG- <b>CCGACTGGCGAGAGCCAGGTAACGAATG</b> -CAAGACGTCCCCTGT-TAACGGCCGACATGAGAG         |
| D6         | GGGACACAATGGACG- CGCCTCCAATTG- <b>CCGACTGGCGA</b> <b>AGCCAGGTAACGAATG</b> -CCAATAGCCCCTCCG-TAACGGCCGACATGAGAG    |
| D7         | GGGACACAATGGACG-CGTACCATAAGGCCT- <b>CCGACTGGCGAGAGCCAGGTAACGAATG</b> -AGGGGATTAACACTC-TAACGGCCGACATGAGAG         |
| D8         | GGGACACAATGGACG-CGTACCATAAGGCCT- <b>CCGACTGGCGAGAGCCAGGTAACGAATG</b> -AGGGGATTAACACTC-TAACGGCCGACATGAGAG         |
| D9         | GGGACACAATGGACG-CGTACCATAAGGCCT- <b>CCGACTGGCGAGGGCCAGGTAACGAATG</b> -AGGGGATTAACACTC-TAACGGCCGACATGAGAG         |
| D10        | GGGACACAATGGACG-GGTCTTAATGGTAAG- <b>CCGACTGGCGAGAGCCAGGTAACGAATG</b> -GCACGCGACAAACCA-TAACGGCCGACATGAGAG         |

**Table S3: Characterization of aptamers from the structured library.** For each sequence, we determined and ranked the reads-per-million (RPM) rank and fitness in the Round 2 and Round 3 pools, where fitness is defined as the ratio of the current-round RPM over the previous-round RPM. If fitness is not determined (n.d.), this is because we detected <20 copies of the sequence in the raw sequencing data for the previous round.  $K_d$  is reported with standard deviation measured from three separate samples. Fluorescence enhancement (FE) represents the fluorescent signal fold-increase above background. Data for **MGA** included as a comparator.

| Name (MG-) | Round 3 RPM | Round 3 RPM Rank | Round 2 Fitness | Round 3 Fitness | Round 3 Fitness Rank | $K_d$ (nM) | FE   |
|------------|-------------|------------------|-----------------|-----------------|----------------------|------------|------|
| D1         | 26,679      | 3                | 156.6           | 5.4             | 90                   | 63 ± 6     | 1638 |
| D2         | 1,035       | 72               | n.d.            | 53.9            | 2                    | 59 ± 5     | 1445 |
| D3         | 15,568      | 4                | 347.3           | 1.7             | 278                  | 44 ± 19    | 3660 |
| D4         | 817         | 86               | n.d.            | 42.5            | 3                    | 60 ± 17    | 1338 |
| D5         | 27,590      | 2                | 409.7           | 1.6             | 282                  | 42 ± 9     | 1262 |
| D6         | 518         | 180              | n.d.            | 37.2            | 4                    | 55 ± 16    | 1224 |
| D7         | 420,106     | 1                | 212.4           | 5.5             | 86                   | 20 ± 7     | 2815 |
| D8         | 1,335       | 51               | n.d.            | 59.3            | 1                    | 21 ± 7     | 2392 |
| D9         | 10,981      | 5                | 118.5           | 18.2            | 16                   | 24 ± 6     | 1955 |
| D10        | 529         | 168              | n.d.            | 33.3            | 5                    | n.d.       | n.d. |
| <b>MGA</b> | -           | -                | -               | -               | -                    | 103 ± 31   | 2360 |

**Table S4: Sequences of aptamers selected from the naïve library.** 22 sequences were identified through copy number and fitness analysis. For each sequence, we compared brightness and affinity with and without the 3' poly-A tail that coupled each RNA aptamer to the bead surface. For sequences unaffected (o) or negatively affected (-) by its presence, we removed the tail sequence before conducting any further functional characterization. R3-7 contained a deletion in the forward primer region which is represented as a blank to maintain alignment. The starting library's random region is separated from the constant regions by hyphens.

| Name   | DNA Sequence (5' → 3')                                                      | Poly-A Tail Effect |
|--------|-----------------------------------------------------------------------------|--------------------|
| R3-1   | GGGACACAATGGACG-TGCACGGAGGGCCTCTGGTCCTTAGTTTAATCCATAACG-TAACGGCCGACATGAGAG  | +                  |
| R3-2   | GGGACACAATGGACG-TACAATCTCAGGTGCACCTTTAGACCACTGTGTCTCTACA-TAACGGCCGACATGAGAG | o                  |
| R3-3   | GGGACACAATGGACG-CTAGCTTCGAGTAACGAAACGCGTGAGGCTGCCCCGCTCC-TAACGGCCGACATGAGAG | o                  |
| R3-4   | GGGACACAATGGACG-AGTCTAGAGCGGGTACCTGTGCTGCAAATCTCCGTCCT-TAACGGCCGACATGAGAG   | +                  |
| R3-5   | GGGACACAATGGACG-GTCCCAAGGAGGTGGGTGGTGGTGTGCGACTCCTTTTCTT-TAACGGCCGACATGAGAG | o                  |
| R3-6   | GGGACACAATGGACG-GTGCCACCAGACTCAGCACTAGATCCGGCCGAGTAACGA-TAACGGCCGACATGAGAG  | -                  |
| R3-7   | GGGACACA TGGACG-GTCCCAAGGAGGTGGGTGGTGGTGTGCGACTCCTTTTCTT-TAACGGCCGACATGAGAG | o                  |
| R3-8   | GGGACACAATGGACG-AGAAATTGTGTAAGACCTTATTGAATGAGGCGCAACTCGC-TAACGGCCGACATGAGAG | -                  |
| R3-9   | GGGACACAATGGACG-TACAATCTTAGGTGCACCTTTAGACCACTGTGTCTCTACA-TAACGGCCGACATGAGAG | -                  |
| R3-10  | GGGACACAATGGACG-CTAGCTCCGAGTAACGAAACGCGTGAGGCTGCCCCGCTCC-TAACGGCCGACATGAGAG | -                  |
| R3-B-1 | GGGACACAATGGACG-TTACAATACAAGTCTTCGAAGACTGAGTTTCCATCTCCA-TAACGGCCGACATGAGAG  | +                  |
| R3-B-2 | GGGACACAATGGACG-TTACAATACAAGTCTTCGAAGACTGAGTTTCCATCTCCA-TAACGGCCGACATGAGAG  | +                  |
| R3-B-3 | GGGACACAATGGACG-TTCATCAACATAGGAGTGGGAGGGTAGCTAGGGCTCGTG-TAACGGCCGACATGAGAG  | -                  |
| R3-B-4 | GGGACACAATGGACG-AGTCTAGAGCGGGTACCTGTGCTGCAAATCTCCGTCATT-TAACGGCCGACATGAGAG  | -                  |
| R3-R-1 | GGGACACAATGGACG-ATCGATTCAATGCCGCCAAGGGCTAGCCCGATCCATAACG-TAACGGCCGACATGAGAG | +                  |
| R3-R-2 | GGGACACAATGGACG-CGCGTGCAACAGGGCCTGATCCAGCACTCACTTATAACG-TAACGGCCGACATGAGAG  | +                  |
| R3-R-3 | GGGACACAATGGACG-TACAAGAGATTCAAGCGACGGTCTTCCACACCCAACTCG-TAACGGCCGACATGAGAG  | +                  |
| R3-R-4 | GGGACACAATGGACG-TGCACGGAGGGCCTCTGGTCCTTAGTTTAATCCATAACG-TAACGGCCGACATGAGAG  | -                  |
| R3-R-5 | GGGACACAATGGACG-ATCGATTCAATGCCGCCAAGGGCTGGCCCGATCCATAACG-TAACGGCCGACATGAGAG | o                  |
| R3-R-6 | GGGACACAATGGACG-CGCGCGGGTCTCGAGACCCTGAATCATTTCTCGAAAAACG-TAACGGCCGACATGAGAG | +                  |
| R3-R-7 | GGGACACAATGGACG-CGCGTCACCAGGGACACTCGGATCCACTCACATCATAACG-TAACGGCCGACATGAGAG | o                  |
| R3-R-8 | GGGACACAATGGACG-CGCGTGCAACAGGGCCTGATCCAGCACTCACTTATAACG-TAACGGCCGACATGAGAG  | +                  |

**Table S5: Characterization of aptamers from the naïve library.** RPM, fitness and  $K_d$  data are presented for our 22 selected sequences as described in Table S3. Sequences whose  $K_d$  exceeded the limit of detection ( $\sim 2 \mu\text{M}$ ) were not determined (n.d.). Fluorescence enhancement (FE) was determined only for sequences with a measured  $K_d$  and represents the fluorescent signal fold-increase above background. Because these enhancements were measured under MG titration, FE values represent a minimum value, except for **MGA**. Data for **MGA** included as a comparator.

|                | Name   | RPM     | RPM Rank | Fitness | Fitness Rank | $K_d$ (nM)     | FE   | $\lambda_{exc}^{max}$ (nm) | $\lambda_{em}^{max}$ (nm) |
|----------------|--------|---------|----------|---------|--------------|----------------|------|----------------------------|---------------------------|
| Round 3 Pool   | R3-1   | 157,406 | 1        | 6.34    | 333          | $2017 \pm 167$ | 111  | 646                        | 675                       |
|                | R3-2   | 111,565 | 2        | 13.01   | 72           | $42 \pm 12$    | 19   | 641                        | 669                       |
|                | R3-3   | 110,502 | 3        | 6.04    | 357          | n.d.           | n.d. | 634                        | 652                       |
|                | R3-4   | 96,745  | 4        | 8.43    | 216          | n.d.           | n.d. | 631                        | 649                       |
|                | R3-5   | 95,075  | 5        | 10.04   | 141          | $92 \pm 22$    | 50   | 635                        | 658                       |
|                | R3-6   | 2,295   | 16       | 25.9    | 1            | $111 \pm 11$   | 259  | 633                        | 651                       |
|                | R3-7   | 165     | 242      | 22.08   | 2            | $125 \pm 34$   | 42   | 635                        | 658                       |
|                | R3-8   | 131     | 303      | 21.29   | 3            | $29 \pm 8$     | 18   | 628                        | 651                       |
|                | R3-9   | 195     | 199      | 20.92   | 4            | $38 \pm 10$    | 38   | 641                        | 669                       |
|                | R3-10  | 3,249   | 13       | 17.19   | 16           | $220 \pm 39$   | 317  | 634                        | 652                       |
| Round 3-B Pool | R3-4   | 707,584 | 1        | 7.12    | 69           | n.d.           | n.d. | 631                        | 649                       |
|                | R3-3   | 13,082  | 2        | 0.12    | 235          | n.d.           | n.d. | 634                        | 652                       |
|                | R3-2   | 11,302  | 3        | 0.10    | 237          | $42 \pm 12$    | 19   | 641                        | 669                       |
|                | R3-1   | 8,281   | 4        | 0.05    | 247          | $2017 \pm 167$ | 111  | 646                        | 675                       |
|                | R3-5   | 7,517   | 5        | 0.08    | 243          | $92 \pm 22$    | 50   | 635                        | 658                       |
|                | R3-B-1 | 1,102   | 45       | 42.67   | 1            | $320 \pm 26$   | 620  | 631                        | 650                       |
|                | R3-B-2 | 422     | 95       | 17.20   | 3            | $144 \pm 26$   | 495  | 634                        | 652                       |
|                | R3-B-3 | 1,213   | 37       | 11.45   | 4            | $2094 \pm 347$ | 219  | 631                        | 649                       |
|                | R3-B-4 | 1,493   | 33       | 8.67    | 24           | $579 \pm 75$   | 4273 | 637                        | 654                       |
| Round 3-R Pool | R3-1   | 571,285 | 1        | 3.57    | 165          | $2017 \pm 167$ | 111  | 646                        | 675                       |
|                | R3-2   | 95,829  | 2        | 0.84    | 350          | $42 \pm 12$    | 19   | 641                        | 669                       |
|                | R3-R-1 | 28,654  | 3        | 5.03    | 59           | $1301 \pm 345$ | 275  | 646                        | 675                       |
|                | R3-R-2 | 18,279  | 4        | 2.49    | 270          | $1549 \pm 441$ | 238  | 646                        | 675                       |
|                | R3-R-3 | 8,753   | 5        | 0.59    | 383          | n.d.           | n.d. | 636                        | 656                       |
|                | R3-R-4 | 708     | 68       | 14.92   | 1            | $1045 \pm 124$ | 189  | 646                        | 675                       |
|                | R3-R-5 | 249     | 142      | 13.39   | 2            | $1488 \pm 370$ | 79   | 646                        | 675                       |
|                | R3-R-6 | 82      | 307      | 11.25   | 4            | $1827 \pm 175$ | 148  | 646                        | 675                       |
|                | R3-R-7 | 399     | 104      | 10.1    | 6            | $1561 \pm 221$ | 198  | 646                        | 675                       |
|                | R3-R-8 | 76      | 316      | 10.01   | 7            | $1590 \pm 226$ | 237  | 646                        | 675                       |
|                | MGA    | -       | -        | -       | -            | $103 \pm 31$   | 2360 | 633                        | 652                       |

**Table S6: Motif minimization of red-shifted aptamers.** A conserved motif was identified in sequences exhibiting the unique 675-nm emission maximum. Pair-wise truncation analysis revealed a short, 15-nt motif that is responsible for this fluorescence profile. The following RNA sequences were ordered from IDT and prepared in triplicate at concentrations of 100 nM RNA and 1  $\mu$ M MG in PBSMT, pH 6.1. Fluorescence intensity was measured at 675 $\pm$ 20 nm using a Tecan M1000 plate reader with excitation at 630 $\pm$ 20 nm. Intensity was normalized to the signal from the 21-bp sequence.

| Sequence (5' $\rightarrow$ 3') | Length (bp) | Normalized Intensity |
|--------------------------------|-------------|----------------------|
| CAUAACGUAACGGCCGACAUG          | 21          | 1.00                 |
| AUAACGUAACGGCCGACAU            | 19          | 0.70                 |
| UAACGUAACGGCCGACA              | 17          | 0.92                 |
| AACGUAACGGCCGAC                | 15          | 0.80                 |
| ACGUAACGGCCGA                  | 13          | 0.05                 |
| CGUAACGGCCG                    | 11          | 0.00                 |

**Table S7: Summary of FACS procedures.** The number of particles sorted and collected from the respective emission channels during each sort with the structured library and naïve library. Each set of collected particles was combined prior to PCR amplification, such that only a single pool was prepared and sorted in subsequent rounds of GRAP display.

|                    | Pool Sorted   | Resulting Pool | MG Concentration | Particles Sorted      | 670 $\pm$ 30nm Particles | 730 $\pm$ 45nm Particles | 780 $\pm$ 60nm Particles |
|--------------------|---------------|----------------|------------------|-----------------------|--------------------------|--------------------------|--------------------------|
| Structured Library | Starting      | Round 1        | 50 nM            | 5.3 * 10 <sup>7</sup> | 8,428                    | -                        | -                        |
|                    | Round 1       | Round 2        | 1 nM             | 8.0 * 10 <sup>6</sup> | 1,198                    | -                        | -                        |
|                    | Round 2       | Round 3        | 400 pM           | 1.0 * 10 <sup>7</sup> | 1,473                    | -                        | -                        |
| Naïve Library      | Round 2 SELEX | Round 1        | 10 $\mu$ M       | 6.0 * 10 <sup>7</sup> | 6,646                    | 6,713                    | 4,946                    |
|                    | Round 1       | Round 2        | 1 $\mu$ M        | 1.7 * 10 <sup>7</sup> | 7,532                    | 5,536                    | 5,210                    |
|                    | Round 2       | Round 3        | 100 nM           | 8.0 * 10 <sup>6</sup> | 21,332                   | 18,795                   | 18,640                   |
|                    | Round 3       | Round 3-B      | 1 $\mu$ M        | 3.0 * 10 <sup>5</sup> | 20,000                   | 0                        | 0                        |
|                    | Round 3       | Round 3-R      | 1 $\mu$ M        | 3.0 * 10 <sup>5</sup> | 0                        | 0                        | 20,000                   |
